# Supplementary material for: Chemical reactions under the nanofluidic confinement of reconstructed lamellar membranes
Source: Royal Society of Chemistry journal article supplement (doi:10.1039/c8ta07170e), 2018-01-01
Supplement: c8ta07170e1.pdf [file c8ta07170e1.pdf]

**Supplementary Information**

**Chemical Reactions under the Nanofluidic Confinement of Reconstructed  
Lamellar Membrane**

Kundan Saha, † Jumi Deka, † Sushovan Hens, Sourav Saikia, and Kalyan Raidongia\*

Department of Chemistry, Indian Institute of Technology Guwahati, Guwahati,  
781039, Assam.

Email: k.raidongia@iitg.ernet.in

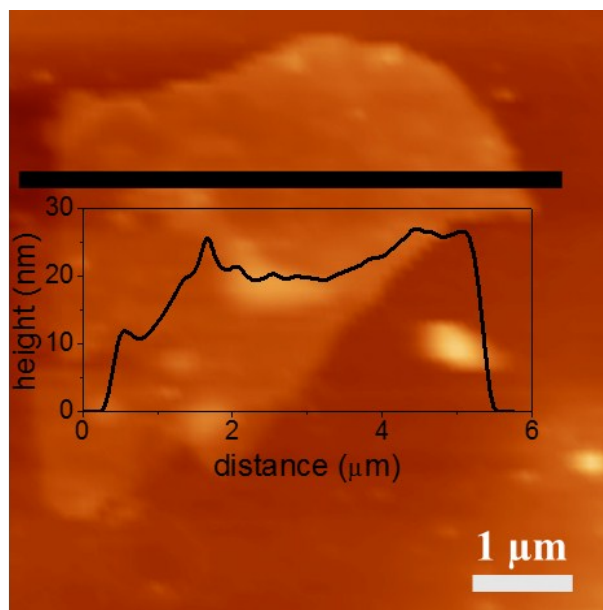

**Figure S1.** AFM image of exfoliated vermiculite nanoflakes along with a corresponding height profile.

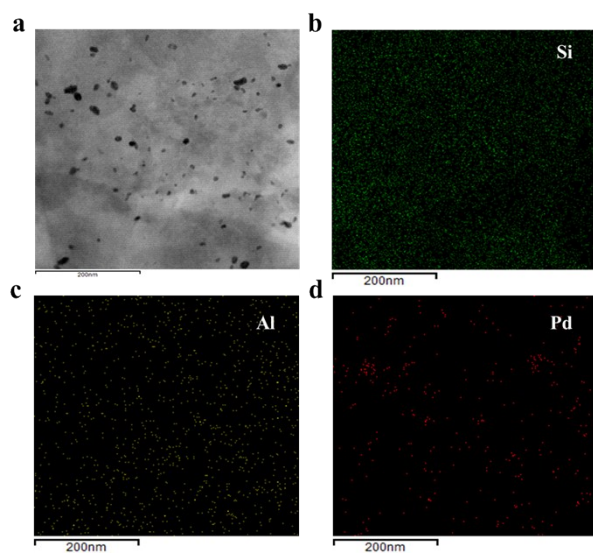

**Figure S2.** TEM-EDX elemental mapping of a Pd-VM-NF, for (b) silicon, (c) aluminium, and (d) palladium atoms.

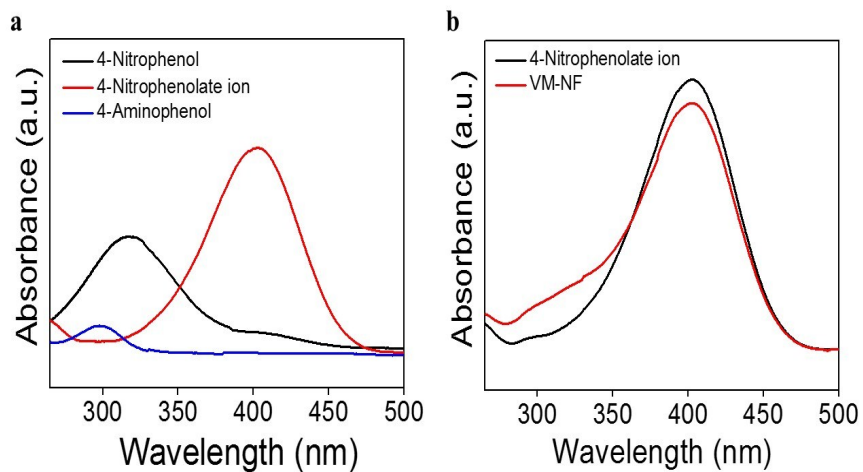

**Figure S3.** UV-Vis spectra showing reduction of 4-NP to 4-AP using (a) Pd-VM-NF, and (b) vermiculite nanoflakes as catalyst in presence of 1 M NaBH<sub>4</sub> (30  $\mu$ L) for 0.1 mM 4-NP (2 mL).

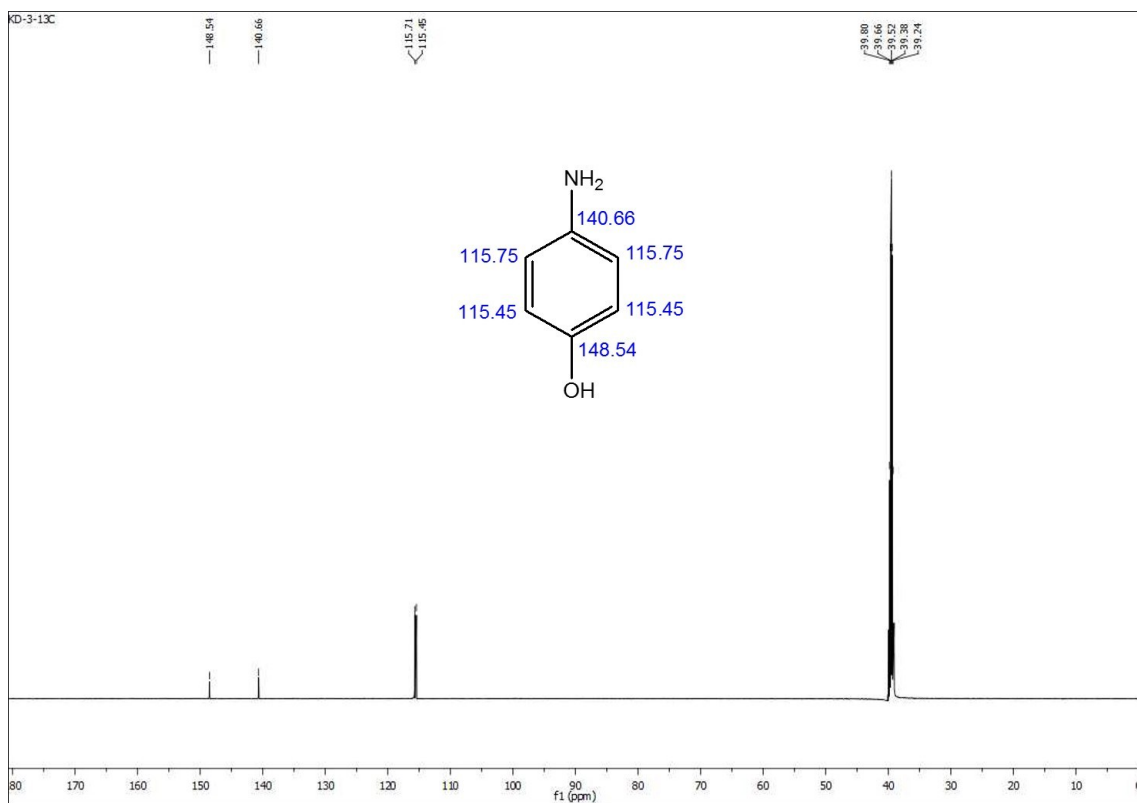

**Figure S4.** <sup>13</sup>C NMR spectra of the product (4-NP) obtained from the reaction inside the catalytic nanochannels of Pd-VM membrane.

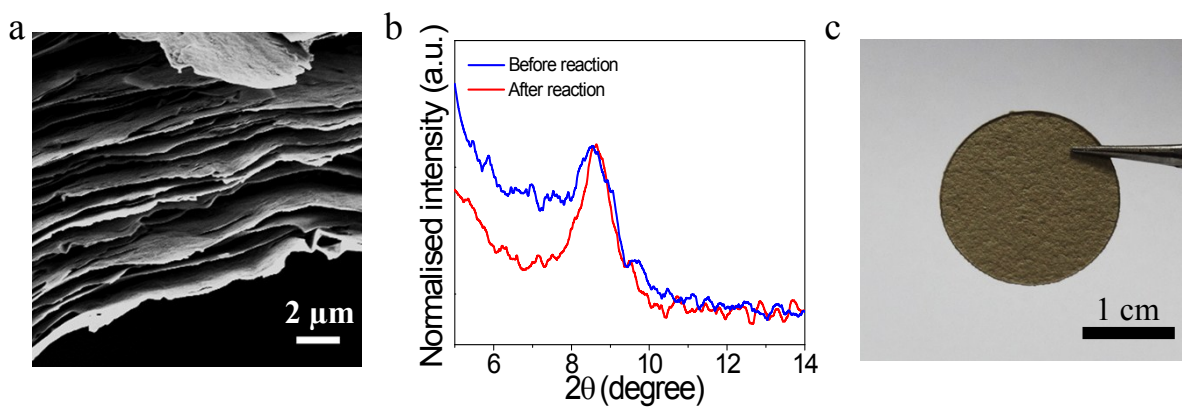

**Figure S5.** Stability of the catalytic Pd-VM membrane: (a) Cross-sectional FESEM image, (b) pXRD pattern and (c) optical image of Pd-VM membrane after completion of the catalytic reaction.

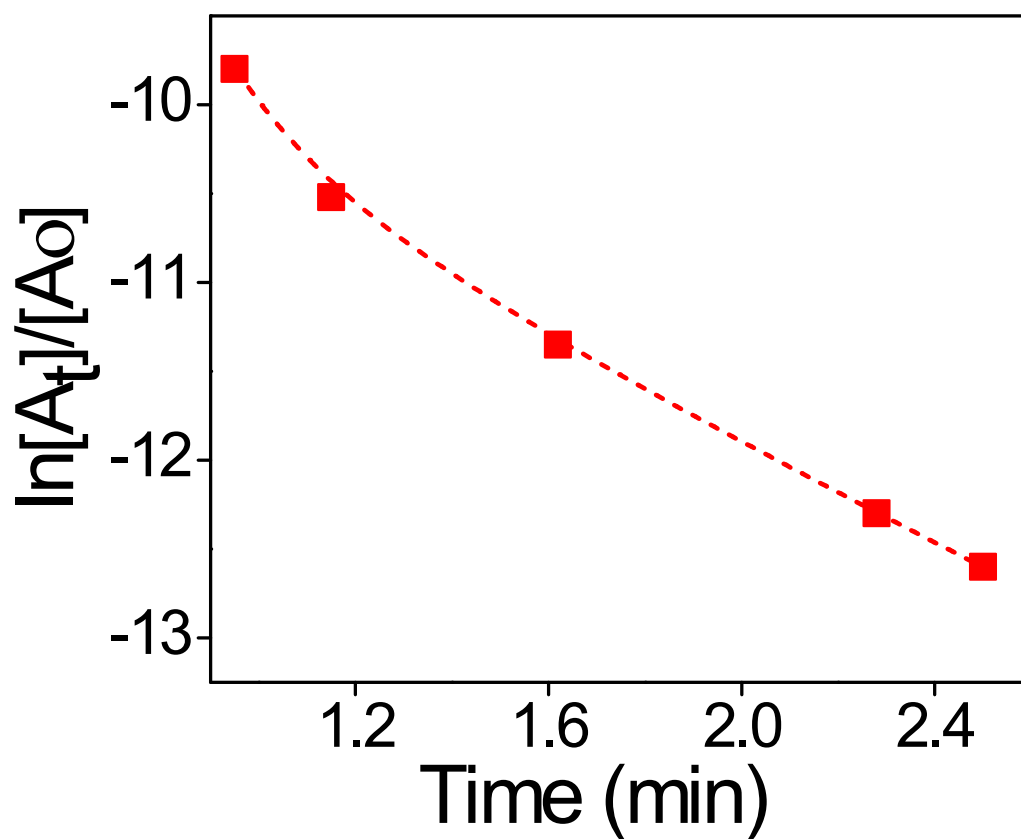

**Figure S6.** Concentration vs time graph for phenolate intermediate. The reaction was performed in Pd-VM membrane of five different thicknesses ranging from 00.4 to 0.32 mm using 0.1 mM 4-NP (2 mL) and 0.05 M NaBH<sub>4</sub> (30  $\mu$ L).

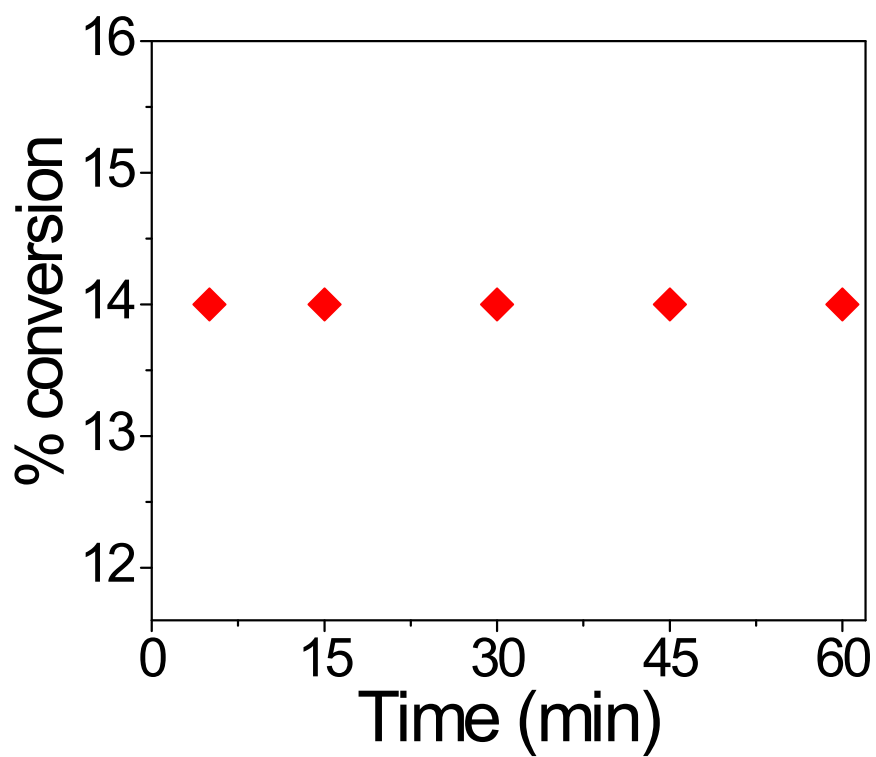

**Figure S7.** Progress of the reduction reaction of 4-NP to 4-AP with Pd-VM-NF in bulk stirring condition, concentration of  $\text{NaBH}_4$  was kept as 0.05 M.



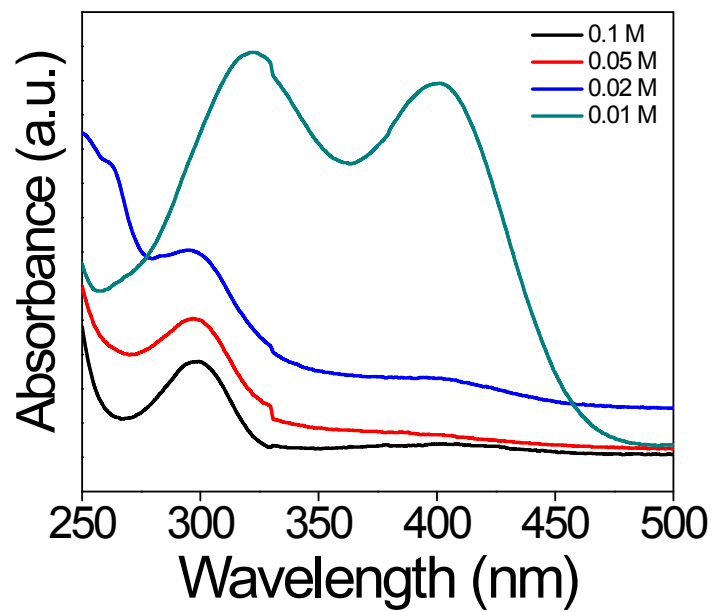

**Figure S8.** UV-Vis spectra of the products obtained from the reaction of 4-NP with different concentrations of NaBH<sub>4</sub> (from 0.1 M to 0.01 M), inside the catalytic nanochannels of Pd-VM membrane.

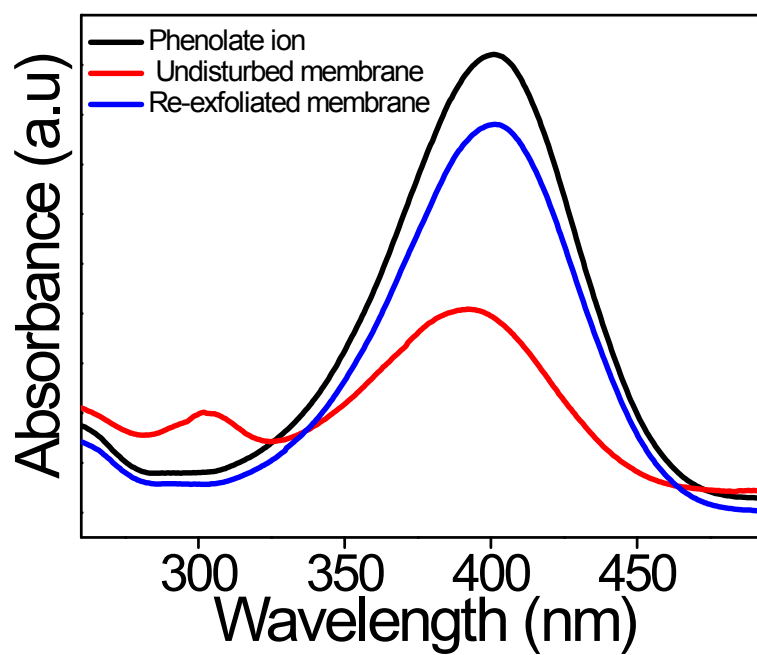

**Figure S9.** UV-Vis spectra of the reaction mixtures comparing conversion of 4-NP to 4-AP through Pd-VM membrane pre-treated with (0.1 M)  $\text{NaBH}_4$ . While the red curve represent reaction through undisturbed membrane, the blue curve represent reaction with the re-exfoliated flakes of pre-treated membrane.

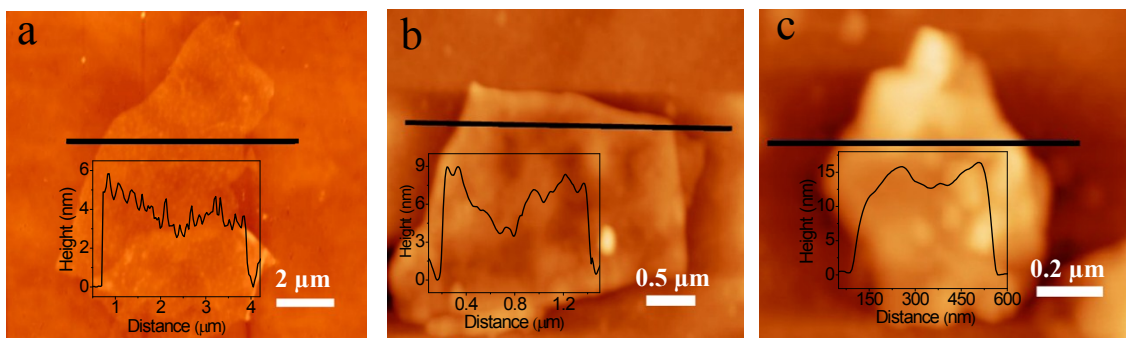

**Figure S10.** AMF images of vermiculite nanoflakes of different size fractions obtained *via* centrifugation at (a) 700 rpm, (b) 1000 rpm and (c) 2000 rpm. The corresponding height profiles are given as the inset.

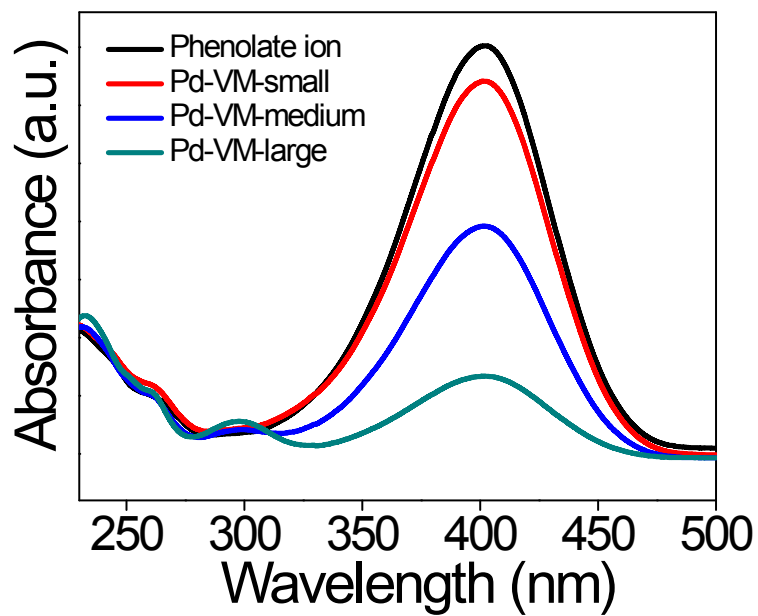

**Figure S11.** Effect of nanoflakes dimension on the reduction reaction: UV-Vis spectra showing conversion 4-NP to 4-AP through membranes fabricated using Pd-VM-NF of different dimensions of flakes.

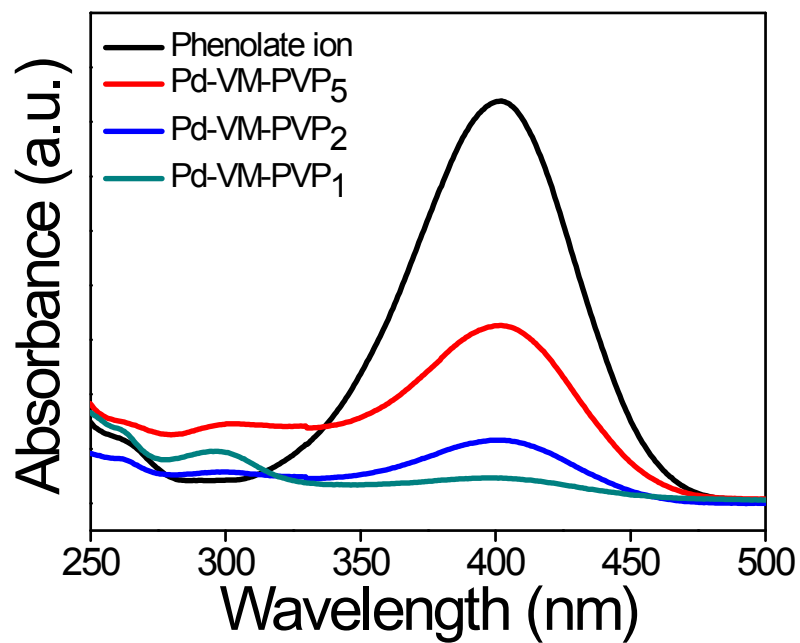

**Figure S12.** UV-Vis spectra showing conversion of 4-NP to 4-AP through Pd-VM-NF membrane with altered channel heights using different ratio of PVP polymer as spacers.

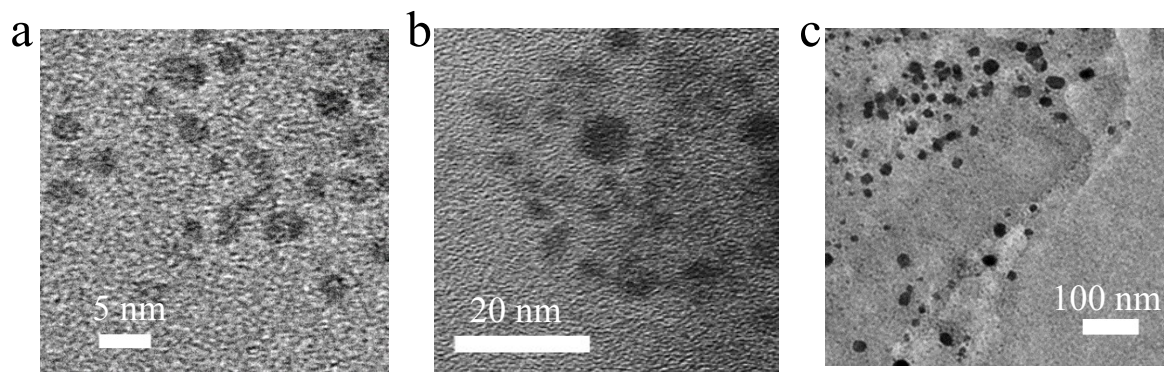

**Figure S13.** TEM image of Pd-VM-NF obtained by stirring VM-NF with (a) 0.005 M, (b) 0.01 M and (c) 0.1 M of Pd<sup>2+</sup> solution.

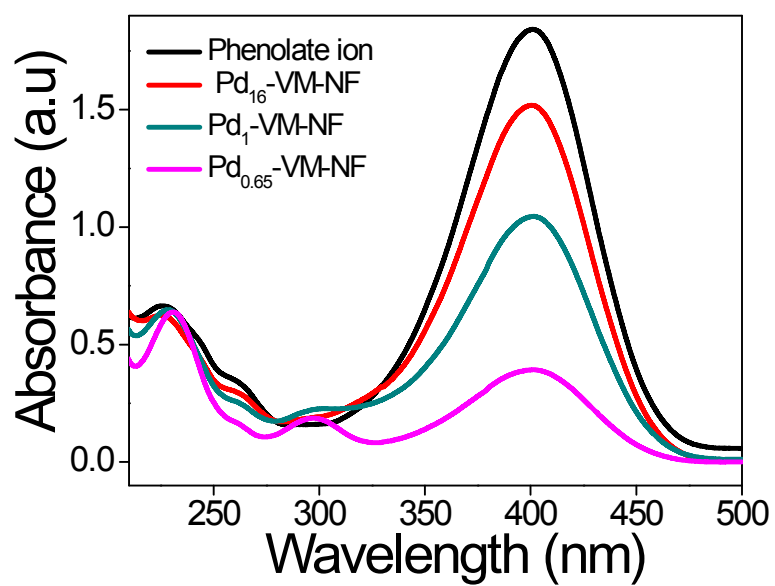

**Figure S14.** UV-Vis spectra showing conversion of 4-NP to 4-AP through Pd-VM membrane loaded with different percentage of palladium.

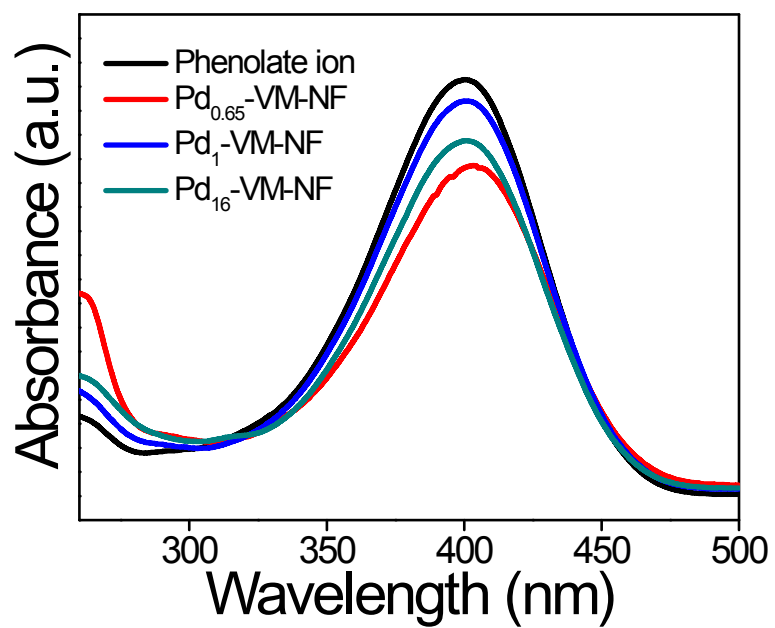

**Figure S15.** UV-Vis spectra showing conversion of 4-NP to 4-AP in Pd-VM membrane loaded with Pd nanoparticles of different sizes, in presence of 0.01 M NaBH<sub>4</sub>.



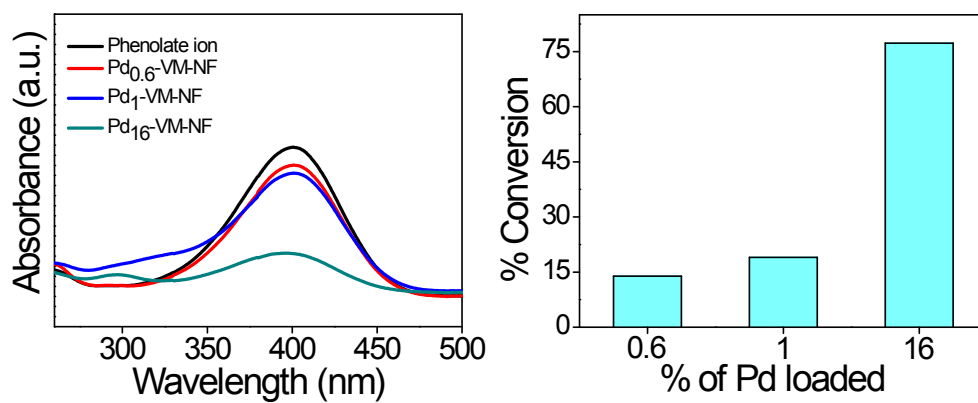

**Figure S16.** Catalytic activity of Pd-VM-NF with different palladium content towards reduction of 4-NP to 4-AP under bulk (stirring) condition.

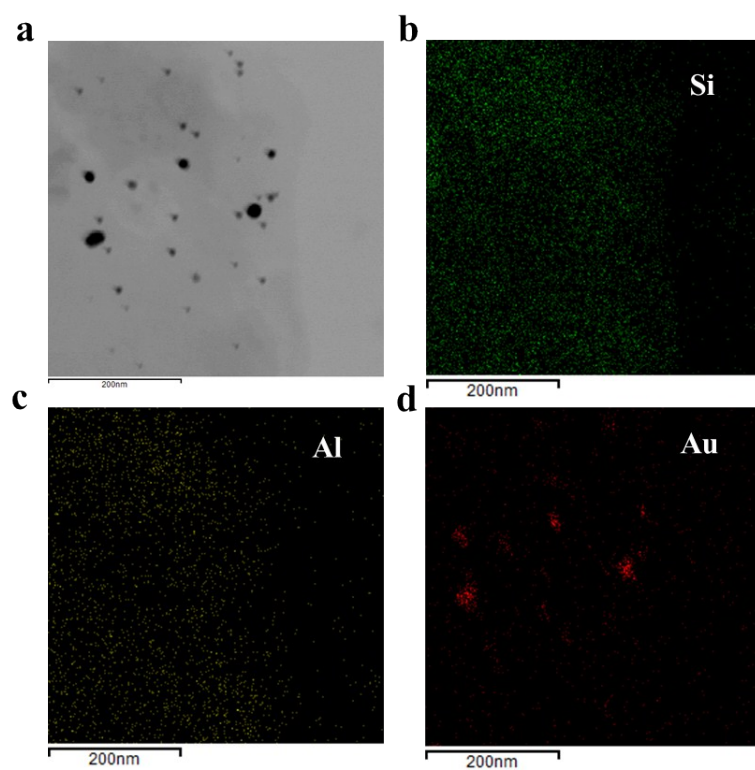

**Figure S17.** TEM-EDX elemental mapping of Au-VM-NF: (b) silicon, (c) aluminium, and (d) gold atoms.

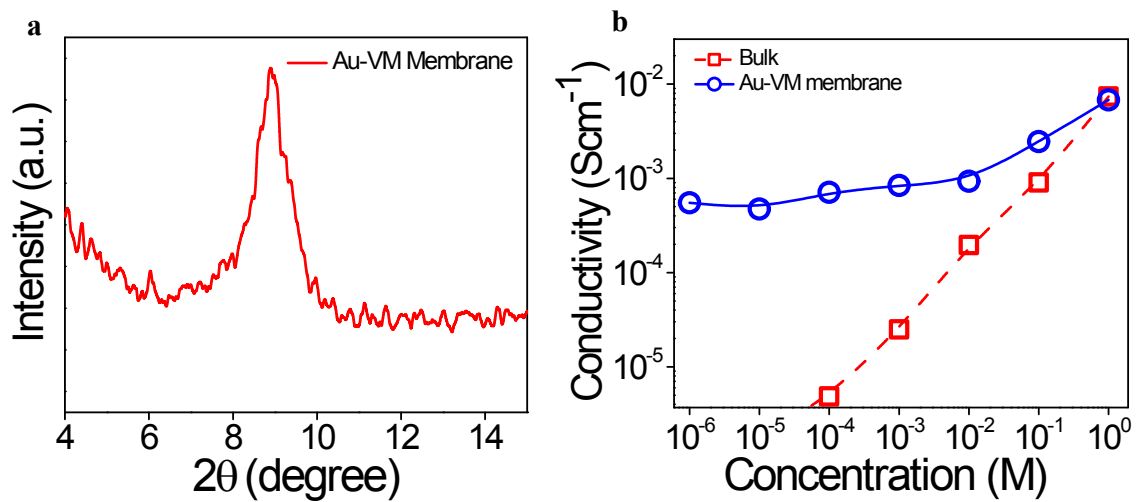

**Figure S18.** (a) Powder XRD pattern, and (b) Surface charge governed ionic transport behaviour of the Au-VM-NF membrane.
